# Supplementary material for: Role of serum complement C3 and C4 on kidney outcomes in IgA nephropathy
Source: Springer Nature journal article supplement (doi:10.1038/s41598-024-65857-w), 2024-07-13

**Table 1 - Supplementary. Multivariate linear regression between serum C3 and C4 with eGFR at baseline.**

| Characteristic | Beta  | p-value |
|----------------|-------|---------|
| C3 (mg/dL)     | 0.30  | 0.05    |
| C4 (mg/dL)     | -0.76 | 0.04    |

**Figure 1 – Supplementary. Correlations between C3 and C4 with IgA, IgG.**

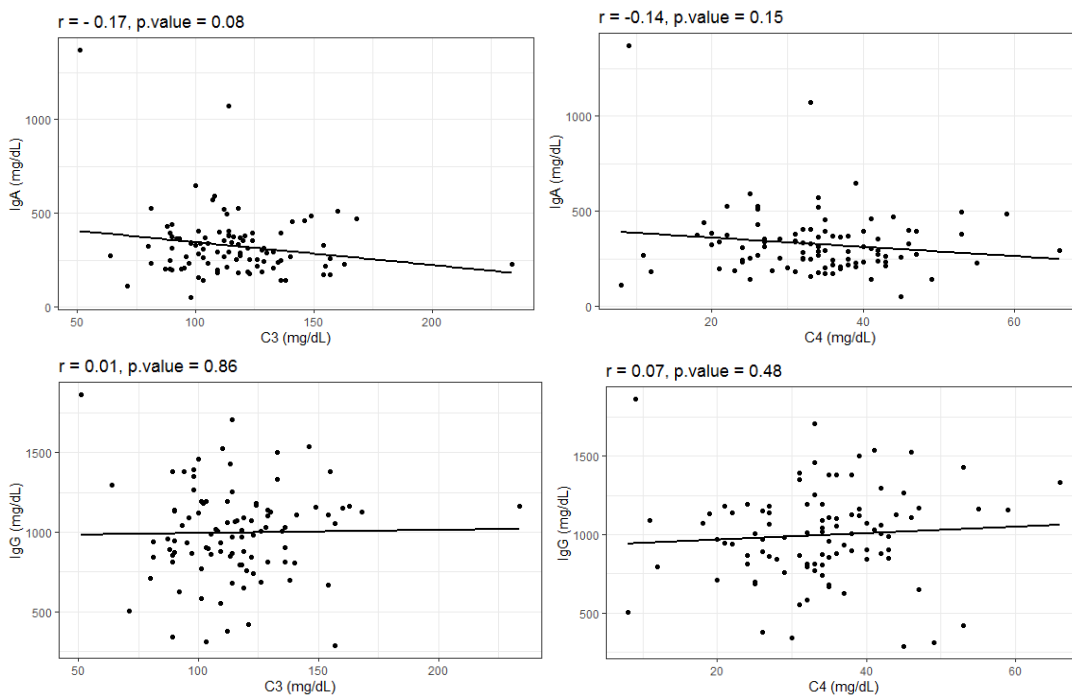

Supplement: MOESM1 [file 41598_2024_65857_MOESM1_ESM.pdf]
